# Supplementary material for: The equatorial position of the metaphase plate ensures symmetric cell divisions
Source: eLife journal article supplement (doi:10.7554/elife.05124), 2015-07-18
Supplement: supp [file elife-05124-supp-v1.zip]

# Figure 2 Supplement 2

Tan et al,

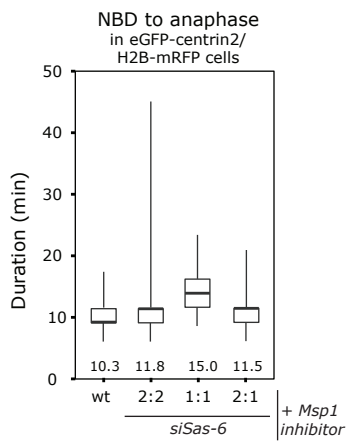

**Figure 2 Supplement 2: Mps1 Inhibition suppresses the anaphase delay in 2:1 cells.** Boxplots for the time between NBD and anaphase onset in wt, 2:2, 1:1 or 2:1 eGFP1-centrin2/H2B-mRFP cells treated with an Mps1 inhibitor. Numbers indicate average anaphase times. Note that 2:1 cells are not delayed when compared to 2:2 cells (Mann Whitney U test,  $p = 0.9673$ )
