# Supplementary material for: The equatorial position of the metaphase plate ensures symmetric cell divisions
Source: eLife journal article supplement (doi:10.7554/elife.05124), 2015-07-18
Supplement: supp [file elife-05124-supp-v1.zip]

Archive with 12 entries (12 files):
- elife_poa_e05124_Video_1.avi
- elife_poa_e05124_Video_7.avi
- elife_poa_e05124_Figure_5_figure_supplement_1.pdf
- elife_poa_e05124_Figure_2_figure_supplement_1.pdf
- elife_poa_e05124_Video_3.avi
- elife_poa_e05124_Figure_2_figure_supplement_2.pdf
- elife_poa_e05124_Video_2.avi
- elife_poa_e05124_Video_8.avi
- elife_poa_e05124_Video_5.avi
- elife_poa_e05124_Video_6.avi
- elife_poa_e05124_Source_Code.zip
- elife_poa_e05124_Video_4.avi
