# Supplementary material for: The equatorial position of the metaphase plate ensures symmetric cell divisions
Source: eLife journal article supplement (doi:10.7554/elife.05124), 2015-07-18
Supplement: supp [file elife-05124-supp-v1.zip › elife_poa_e05124_Figure_2_figure_supplement_1.pdf]

## Figure 2 Supplement 1

Tan et al,

**A**

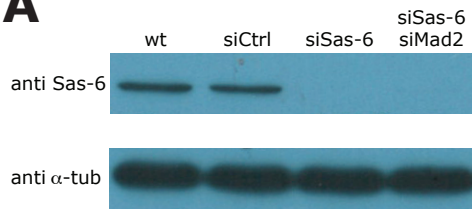

**B**

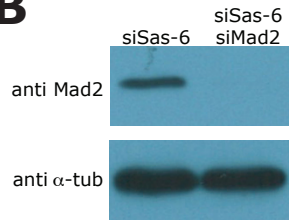

**Figure 2 Supplement 1: Validation of Sas-6 and Mad2 co-depletion.** (A and B) Immunoblots of wild-type, *siControl*-, *siSas-6* or *siSas-6/siMad2* treated eGFP1-centrin2/H2B-mRFP HeLa cells probed with (A) Sas-6 and  $\alpha$ -tubulin antibodies or (B) with Mad2 and  $\alpha$ -tubulin antibodies.
